1 **Soil metatranscriptomics: An improved RNA extraction method toward functional analysis**  
2 **using nanopore direct RNA sequencing**

3 Abdonaser Poursalavati<sup>1,2</sup>, Vahid J. Javaran<sup>1,2</sup>, Isabelle Laforest-Lapointe<sup>2</sup> and Mamadou L.

4 Fall<sup>1\*</sup>

5 <sup>1</sup>Saint-Jean-sur-Richelieu Research and Development Centre, Agriculture and Agri-Food Canada,

6 Saint-Jean-sur-Richelieu, QC J3B 3E6, Canada

7 <sup>2</sup>Département de Biologie, Centre SÈVE, Université de Sherbrooke, Sherbrooke, QC J1K 2R1,

8 Canada

9 \*Corresponding author: M. L. Fall; Email: [mamadoulamine.fall@AGR.GC.CA](mailto:mamadoulamine.fall@AGR.GC.CA)

10

11

12 **Keywords:** Soil, RNA, Humic acid, Nanopore, Direct RNA sequencing, Metatranscriptome,  
13 Extraction, Functional annotation

14

15

16 **Funding:** This work was financially supported by Agriculture and Agri-Food Canada (AAFC)  
17 under the Science Supporting an Innovative and Sustainable Sector.

18

19 **Abstract**

20 Soil microbes play an undeniable role in sustainable agriculture, plant health, and soil  
21 management. A deeper understanding of soil microbial composition and function has been gained  
22 through next-generation sequencing. While soil metagenomics has provided valuable information  
23 about microbial diversity, issues stemming from RNA extraction, low RNA abundance in some  
24 microbial populations (e.g., viruses), and mRNA enrichment have slowed the progress of soil  
25 metatranscriptomics. A variety of soil RNA extraction methods have been developed so far. Yet  
26 none of the available protocols can obtain RNA with high quality, purity, and yield for third-  
27 generation sequencing. This latter requires RNA with high quality and large quantities (with no or  
28 low contamination, such as humic acids). Also, use of commercial kits for in-batch soil RNA  
29 extraction is quite expensive, and these commercial kits lack buffer composition details, which  
30 prevents the optimization of protocols for different soil types. An improved and cost-effective  
31 method for extracting RNAs from mineral and organic soils is presented in this paper. An acidic  
32 sodium acetate buffer and phosphate buffer with modifications to bead-beating and nucleic acid  
33 precipitation lead to higher RNA yields and quality. Using this method, we obtained almost DNA-  
34 free RNA. By using nanopore's direct RNA sequencing, the extracted contamination-free RNAs  
35 were successfully sequenced. Lastly, taxonomic groups such as bacteria, fungi, archaea, and  
36 viruses were classified and profiled as well as functional annotation of the datasets was carried out  
37 using an in-house customized bioinformatics workflow.

38 **Keywords:** Soil, RNA, Humic acid, Nanopore, Direct RNA sequencing, Metatranscriptome,  
39 Extraction, Functional annotation

## 40 **Introduction**

41 As a highly dynamic ecosystem, the soil is a reservoir of various microbes such as bacteria,  
42 archaea, viruses, fungi, and protozoa (Jansson and Hofmockel 2020; Sharuddin et al. 2022). To  
43 balance the negative effects of intensive agriculture on soil functions, we rely on the synergistic  
44 abilities of microorganisms to regulate the biogeochemical cycle in the environment (Cavicchioli  
45 et al. 2019; Sharuddin et al. 2022). Yet, we lack a deep understanding of how soil microbial  
46 community composition and functions support and influence soil biogeochemical processes. A  
47 variety of environmental DNA (eDNA) sequencing methods have been employed to gain  
48 unprecedented insight into soil microbial community composition and diversity (Podolyan and  
49 Grelet 2021; Wang et al. 2009c). For example, amplicon-based gene sequencing (Aguilar-Pulido  
50 et al. 2016; Zuñiga et al. 2017) and shotgun metagenomics (Azeem et al. 2021; Shakya et al.  
51 2019) are widely used for deeper investigation of the soil microbiome. However, these DNA-based  
52 methods are incapable of accurately assessing microbiome functionality and can hardly discern  
53 between active and inactive microbiome members (Sharuddin et al. 2022). Environmental RNA  
54 (eRNA) sequencing is essential to reveal the functions from active microbiome members.

55 Several metatranscriptomic studies have been carried out over the last decade to analyze  
56 gene expression, regulation, and pathways in many different types of biotope (Hayden et al. 2018;  
57 Rajarapu et al. 2015; Sharuddin et al. 2022). However, in the field of soil and environment  
58 metatranscriptomics, the lack of a universal approach to RNA has hampered progress. Obtaining  
59 high-quality and high-quantity RNA from environmental samples has always been a challenge,  
60 especially in soil samples. Following RNA extraction, various compounds like humic and fulvic  
61 acids, as well as polysaccharide compounds, are co-extracted with RNA (Wang et al. 2012a) and  
62 incorporated into downstream enzymatic reactions (such as restriction enzymes, probe

73 hybridization, RNA or DNA digestion, polymerase chain reaction [PCR], reverse transcription,  
74 sequencing, and quantification) (Alm Elizabeth et al. 2000; Chaparro-Encinas et al. 2020; Wang  
75 and Fujii 2011; Zipper et al. 2003). Clay minerals, such as  $\text{Ca}^{2+}$ ,  $\text{Mg}^{2+}$ ,  $\text{Fe}^{3+}$  and  $\text{Al}^{3+}$ , can also  
76 absorb a significant amount of nucleic acid molecules, resulting in a lower level of RNA extraction  
77 (Goring and Bartholomew 1952). In addition, soil samples can contain a wide range of  
78 contaminants including proteins, phenolic compounds, salts, and metal ions (Griffiths et al. 2000;  
79 Wilson 1997). In addition to the aforementioned problems, less than 5% of total RNA is mRNA  
80 in environmental samples, which is highly vulnerable to RNase degradation and has a short half-  
81 life span (Deutscher 2006; Ranjan et al. 2021; Sharma et al. 2012; Steglich et al. 2010). Therefore,  
82 the development of efficient high-quality RNA extraction protocols for different soil sample types  
83 is required. To extract RNA from a variety of soil types, different manual extraction methods have  
84 been optimized (Lever et al. 2015; Lim et al. 2016; Mettel et al. 2010; Paulin et al. 2013; Pei et  
85 al. 2021; Peršoh et al. 2008; Qin et al. 2016; Sharma et al. 2012; Thorn et al. 2019; Wang et al.  
86 2012b). However, soil samples exhibit many heterogeneities that have hampered the development  
87 of a universal RNA extraction method. The manual extraction process has been standardized and  
88 continuously optimized over the past three decades, based on soil sample types. Although there  
89 are several commercial RNA extraction kits that have been used for soil samples, it is not possible  
90 to optimize each kit individually based on the components, since they are not disclosed. Also,  
91 under certain conditions, it may be necessary to increase the sample mass for RNA extraction from  
92 low -biomass samples to isolate low-copy-number mRNA; therefore, using commercial kits is not  
93 cost-effective and feasible (Lever et al. 2015; Lim et al. 2016; Thorn et al. 2019).

94 In this study, our main goal was to develop a high-yield and high-quality RNA extraction  
95 method for two types of agricultural soils (mineral and organic) for taxonomic and functional

analysis of soil microbial communities. We used Griffiths' extraction method (Griffiths et al. 2000) to form the backbone of our improved and developed extraction procedure. The most important modifications we made were the use of phosphate buffer and acidic sodium acetate buffers during the bead beating and phenol-chloroform extraction processes, respectively. It was surprising to find that the sodium acetate buffer not only decreased the humic substances, but also allowed us to extract DNA-free total RNA. We compared our developed extraction method with four more popular manual extraction methods developed for soil nucleic acids extraction. Our developed method improved not only the purity, but also the integrity of extracted RNA, which makes the extracted materials suitable for diverse kinds of molecular biology investigations at a reasonable price, ten times cheaper than using disparate commercial kits for DNA and RNA isolation. The extracted RNA was then successfully used for direct RNA nanopore sequencing. Four soil microbiome libraries were prepared from mineral and organic soils, and an overarching review of the soil microbiome was characterized after sequencing and data analysis.

## **Materials and methods**

### **Soil sampling and analysis of soil physicochemical properties**

Four mineral soil horizons of 5 to 15 cm depth were sampled from Agriculture and Agri-Food Canada's experimental farm (vineyard) in Frelighsburg, Quebec, Canada. As well, four organic soil horizons were sampled at a depth of 0 to 10 cm from Agriculture and Agri-Food Canada's experimental farm (lettuce field) in Sainte-Clotilde, Quebec, Canada. The soil samples were stored at -20 °C until they were used. Our soil samples were submitted to AgroEnviroLab for the determination of soil pH and for the extraction and quantification of main exchangeable minerals, aluminum (Al), copper (Cu), zinc (Zn), manganese (Mn) and iron (Fe), through the Mehlich 3 extraction method (Mehlich 1984).

## 109 **Total RNA extraction by improved method**

110 A decontaminating mixture of sodium hypochlorite, 10% v/v; sodium dodecyl sulfate (SDS), 1%  
111 w/v; sodium hydroxide (NaOH), 1% w/v; and sodium bicarbonate (NaHCO<sub>3</sub>), 1% w/v, was made  
112 to clean up the work surfaces (Fischer et al. 2016). To eliminate nucleases, all implements and  
113 tools were autoclaved for 15 minutes at 121 °C. In addition, the water stock used for RNA elution  
114 was treated by RNASecure (Ambion) to reduce the possibility of nuclease contamination during  
115 extraction.

116 The samples were passed through a 4-mm mesh sieve, and RNA was extracted directly  
117 from them (Fig. 1). For mineral and organic soil, 250- and 200-mg stone-free soil samples were  
118 collected and transferred into 2-ml screw-tubes, respectively. Each tube contained 1 gram of  
119 0.1-millimeter silica beads and three beads of 0.3 millimeter size. Next, 200 µl pre-heated (60 °C)  
120 extraction buffer (10% Cetyltrimethyl ammonium bromide [CTAB], 0.7 M NaCl, 3.4%  
121 Polyvinylpyrrolidone [PVP], 240 mM phosphate buffer, pH = 5.8), 400 µl 150 mM phosphate  
122 buffer (pH = 5.8), 10 µl 2-Mercaptoethanol, 300 µl water-saturated phenol, and 200 µl Chloroform  
123 were added. Before the bead-beating steps, tubes were incubated on ice and cooled for 2 minutes.  
124 Two FastPrep bead-beating steps (6.5 m/s for 20 seconds) and one intermediate cooling step on  
125 ice (for 1 min) were completed. After that, samples were vortexed for 5 min periodically, and  
126 during vortexing time, tubes were placed on ice to keep them cooled. After the centrifugation at  
127 10,000X g for 2 min at 4 °C, the aqueous phase (approximately 550 ul) was transferred into a new  
128 2-ml tube. Next, 350 µl 3M NaAc (pH = 4.6) was added to the previous solution and incubated on  
129 ice for 2 min. Then, 600 µl water-saturated phenol was added, mixed, and incubated on ice for 3  
130 min. Next, 300 µl chloroform was added and mixed vigorously. After incubation on ice for 3 min,  
131 tubes were centrifuged for 10 min at 10,000X g at 4 °C. The aqueous phase was transferred into a

132 new 2-ml tube, and another chloroform extraction (1 v/v) was performed and centrifuged for 10  
133 min at 10,000X g at 4 °C.

134 In the next step, the aqueous phase (approximately 500 to 600 ul) was transferred into a  
135 new 1.5-ml tube. One volume PEG-NaCl precipitation buffer (0.6 M NaCl and 30% PEG-8000)  
136 was added, and the solution was incubated on ice in a refrigerator (4 °C) for 20 min. To visually  
137 monitor the RNA pellet precipitation, 1 µl glycogen RNA grade can be added. The tubes were  
138 centrifuged for 20 min at 15,000 rpm at 4 °C. After that, the PEG supernatant was removed  
139 carefully by pipetting. The RNA pellet was washed with 80% cold ethanol two times. After each  
140 washing step, a centrifugation step at 15,000 rpm for 5 min at 4 °C was done. Finally, the RNA  
141 pellet was dried under laminar hood and dissolved in 50 µl treated water with RNasecure.

#### 142 **Total RNA extraction by other conventional methods**

143 In this study, Griffiths' (Griffiths et al. 2000), Thorn's (Thorn et al. 2019), Sharma's (Sharma et  
144 al. 2012), and Angel's (Angel et al. 2012) RNA extraction methods, which are the main methods  
145 for RNA extraction from soil and constitute the backbone of our improved and optimized method,  
146 were applied in the same eight soil samples described in the previous section to compare their  
147 efficiencies with our improved method.

#### 148 **Quality and quantity evaluation of extracted RNA**

149 RNA extracted using the five different methods was electrophoresed on 1.0% agarose gel to  
150 confirm its integrity and quality. Nanodrop 2000 spectrophotometry (Thermo Fisher Scientific,  
151 Waltham, MA) was used to determine the purity of the extracted RNA. Pure RNA was defined as  
152 having the A260/A280 ratio = 1.8 ~ 2.2 and the A260/A230 ratio > 1.8. Various wavelengths  
153 (320 or 270 nm) and spectrum ratios (from 465 to 665) have been used to quantify humic  
154 substances (Wnuk et al. 2020). Mettel *et al.* concluded that 400-nm wavelengths were more useful

100 than 320-nm measurements for quantifying humic substances due to the avoidance of the  
106 overlapping absorbance errors that occurred in the absorbance spectrum of RNA and humic acids  
107 at 320-nm measurements (Mettel et al. 2010). Hence, 400-nm wavelength was considered for  
108 humic acid measurements in this study. The quantification of DNA and RNA at different steps of  
109 extraction and library preparation were performed by qubit spectrofluorometry using Qubit  
160 dsDNA High Sensitivity and Qubit™ RNA High Sensitivity kits, respectively (Qubit Fluorometer,  
161 Invitrogen, LifeTechnologies).

### 162 **DNase treatment and polyadenylation**

163 According to gel electrophoresis results, no DNA contamination was observed in extracted RNAs.  
164 However, to be sure, total extracted RNAs were treated with TURBO DNase (Ambion) according  
165 to the manufacturer's instructions. In the presence of 1X DNase buffer and 10 units of TURBO  
166 enzyme, the reaction solution was incubated for 30 mins at 37 °C, then phenol-chloroform  
167 extraction was used to remove the DNase enzyme from the treated sample.

168 To prepare and sequence libraries, two groups of extracted RNA for each soil type were  
169 defined: mRNA group (naturally polyadenylated messenger RNA) and total RNA group (mRNA  
170 + non-polyadenylated RNA). Because reverse transcription of the direct RNA nanopore  
171 sequencing kit is based on ligation of pre-annealed double-stranded adapters (containing poly-T  
172 sequence), the total RNA group was polyadenylated as followed, whereas the mRNA group was  
173 not polyadenylated. Next, 10 ug total RNA, 1 µl (five units) *E. coli* Poly(A) Polymerase (NEB#  
174 M0276), 2 µl 10X *E. coli* Poly(A) Polymerase Reaction Buffer, 2 µl Adenosine triphosphate  
175 (ATP), and 1 µl (40 unit) RNasin® Plus Ribonuclease Inhibitor (Promega Corporation) in a 20-µl  
176 reaction solution were incubated at 37 °C for 3 mins. After that, polyadenylated RNAs were



177 purified from enzyme reactions using the RNAClean XP bead purification system according to the  
178 manufacturer's instruction.

### 179 **Direct RNA nanopore sequencing**

180 The SQK-RNA002 kit (Oxford Nanopore Technologies) was used to generate direct RNA  
181 sequencing libraries according to the manufacturer's protocol with some modifications ( 2). Since  
182 this kit does not include commercial barcodes for multiplexing samples and sequencing them  
183 simultaneously on a single flow cell, four custom reverse transcription adapters (cRTA) based on  
184 the DeePlexiCon protocol (Smith et al. 2020) were used for multiplexing.

185 In summary, 500 ng of polyadenylated RNA was ligated with cRTA using T4 DNA ligase  
186 (New England Biolabs) in the presence of NEBNext Quick Ligation buffer (New England Biolabs)  
187 for 15 minutes at room temperature. The single-stranded cDNA was synthesized with SuperScript  
188 III (Thermo Fisher Scientific) for 50 minutes at 50 °C, followed by the inactivation of the enzyme  
189 reaction for 10 minutes at 70 °C. RNA/cDNA hybrids were then purified using Agencourt  
190 RNAClean XP beads. We measured the quantity of each library with the Qubit dsDNA High  
191 Sensitivity kit and then pooled the libraries by considering an equal amount of each. The RMX  
192 adapter (sequencing adapter) was ligated into the RNA/cDNA hybrid complex using T4 DNA  
193 ligase for 15 minutes at room temperature, and then the pooled library was purified with Agencourt  
194 RNAClean XP beads. Final quantification of the pooled library was performed using the Qubit  
195 dsDNA High Sensitivity kit, followed by loading on the R9.4.1 flow cell connected to the MinION  
196 Mk1B Sequencing Instrument (Oxford Nanopore Technologies).

### 197 **Bioinformatics analysis pipeline**

198 In high-accuracy mode, base-calling and quality assessment of sequencing data were performed  
199 using Guppy (Oxford Nanopore, v6.1.7). We discarded reads with a poor quality score (<7) and

200 lengths under 100 nucleotides. For demultiplexing, DeePlexiCon was used with default settings.  
201 Then, to trim barcodes and middle adapters, Guppy barcoder default parameters were used. Next,  
202 NanoPlot (v1.40.0) (De Coster et al. 2018) was used to generate direct RNA sequencing metrics  
203 such as N50, read count, and quality score (Q). Seqkit (Shen et al. 2016) fq2fa option was used to  
204 convert the trimmed fastq files to fasta files. RATTLE pipeline with a reference-free algorithm (de  
205 la Rubia et al. 2022) was used for read clustering, error correction of reads, and read polishing.  
206 From each cluster, a consensus transcript was extracted, and the abundance was determined by  
207 counting the total reads in each cluster. With SortMeRNA (Kopylova et al. 2012), ribosomal RNA  
208 was then extracted from total RNA samples (from barcodes 1 and 2) using its sensitive database  
209 (smr\_v4.3\_sensitive\_db). Kraken2 v2.0.8-beta (Wood et al. 2019) was used to classify 16S and  
210 18S rRNA reads using the SILVA database (Quast et al. 2013). The non-ribosomal reads (from  
211 barcodes 1 and 2), as well as the mRNA reads (from barcodes 3 and 4), were taxonomically  
212 classified by Kraken2 using the PlusPF database. Pavian v1.0 (Breitwieser and Salzberg 2020) and  
213 Recentrifuge (Martí 2019) were used for comparative analysis of taxonomical classification  
214 results. After Kraken2 analysis, clusters without hits were extracted, and these clusters were  
215 analyzed taxonomically with Centrifuge 1.04 (Kim et al. 2016) using a custom-built database,  
216 whose sequences were obtained from NCBI RefSeq (Virus, Bacteria, Archaea, SAR, Protozoa,  
217 and Fungi, access date 03.06.2022) using Genome\_updater 0.5.1  
218 ([https://github.com/pirovc/genome\\_updater](https://github.com/pirovc/genome_updater)). The minimum hit length (MHL) of 50 was applied  
219 on centrifuge hits (Kim et al. 2016).

220 Through Trinotate v3.2.2 (<https://github.com/Trinotate/Trinotate.github.io>), BLASTX and  
221 BLASTP searches (Altschul et al. 1990) were conducted on the SwissProt database (Bairoch and  
222 Apweiler 1997) to analyze the functional annotation of transcripts. EggNOG-mapper version 2.1.6

223 (Cantalapiedra et al. 2021; Huerta-Cepas et al. 2019) was used to obtain EggNog, KEGG  
224 (Kanehisa and Goto 2000), and COG annotations (Tatusov et al. 2000). SigmaPlot v14.5 (Systat  
225 Software, San Jose, CA) was used to visualize the results of functional annotation. A GO Slim  
226 metagenomics database was then substituted for the pre-packed GO Slim database in the Trinotate  
227 package (Poursalavati et al. 2021). Using Trinotate\_GO\_to\_SLIM, gene ontology identifiers were  
228 assigned to clusters. The annotated KEGG orthologs (KOs) were then processed and analyzed  
229 using the FuncTree 2, an automated annotation server (Darzi et al. 2019). A summary of the  
230 bioinformatics analysis steps is shown in Fig. 3.

## 231 **Results**

### 232 **Soil physiochemical properties**

233 The adsorption of RNA to clay minerals is one of the main problems in soil RNA extraction  
234 (Hashizume 2015). Prior to RNA extraction, we analyzed the physicochemical properties of  
235 collected samples of mineral and organic soils. Texture, organic content, and cations were widely  
236 different in mineral and organic soil samples. Mineral soil samples were found to have acidic pH  
237 values in the range of 5.2 to 5.6, while organic soils were in the range of 6 to 6.8. In terms of  
238 organic content, mineral soil samples ranged from 5.2% to 5.5% and, on the other hand, organic  
239 soils were 67.6% to 73.7% (**Table 1**).

### 240 **Optimization of RNA extraction method for mineral and organic soil samples**

241 The Griffiths' (Griffiths et al. 2000), Thorn's (Thorn et al. 2019), Sharma's (Sharma et al. 2012),  
242 and Angel's (Angel et al. 2012) CTAB extraction and PEG precipitation methods were the  
243 backbone of our optimized method for RNA extraction. Cells were lysed in the first step by  
244 choosing different-sized beads and changing the bead beating speed and duration, but the main  
245 change was adding a phosphate buffer into the sample based on measured pH value (Guerra et al.

2020). A pre-experiment, which used a variety of pH ranges (4.3 to 8) was designed to decrease the amount of co-extracted humic substances by considering the lowest adsorption of RNA to the soil. We found that the amount of humic substances was reduced optimally at pH 5.8 (Supplementary Fig. 1). It was observed that the amount of RNA extracted was the same at pH 5.5, 5.8, and 6, but the lowest levels of humic substances were found at pH 5.8. While lower pH ranges (<5) are recommended in the literature for removing humic substances (Mettel et al. 2010), we noticed that most of the nucleic acids in our experiment were absorbed at pH < 5.5. A second phenol-chloroform extraction in an acidic condition was considered in this protocol to isolate DNA-free RNA and reduce remaining humic compounds. A low-pH (4.6) sodium acetate buffer was used to create the acidic condition within the aqueous phase from the previous step. Sodium acetate has been used previously to separate DNA from RNA (Chomczynski and Sacchi 2006; Xu et al. 2019), however, its efficiency when added to the aqueous phases of soil RNA extraction has not yet been reported. Mettel *et al.* (Mettel et al. 2010) used an acidic phenol (pH = 4.5) to separate DNA from RNA in soil samples, but our results, as well as those of a recently published study (de la Rubia et al. 2022), show that aqueous pH is more important than the pH of the added phenol solution when separating DNA from RNA (de la Rubia et al. 2022). Interestingly, we observed that the addition of low-pH sodium acetate in this step also slightly reduced the amount of humic substances (Supplementary Table 1). To compare and verify the performance of the improved method with the mentioned methods (Angel et al. 2012; Griffiths et al. 2000; Sharma et al. 2012; Thorn et al. 2019), the extraction related to these methods was also investigated in terms of quantity and quality (Fig. 4 and Table 2). RNA integrity was assessed by electrophoresis of total RNA on agarose gels. On the gel, distinct bands were observed for 23S and 16S rRNA (Fig. 4). In total, 2.8 and 2.3  $\mu\text{g/g}$  of total environmental RNA were extracted from mineral and organic samples,

269 respectively, using the different methods. Accordingly, A260/A280 and A260/A230 ratios ranged  
270 from 1.82 to 1.89 and 1.79 to 1.98, respectively (Table 2). The absorbance at A400 was also used  
271 to measure the amount of co-extracted humic substances with RNA (Mettel et al. 2010). With the  
272 improved method, the highest quality and quantity of RNA and total nucleic acid (TNA) were co-  
273 extracted with the lowest amounts of humic substances compared to the four existing methods.  
274 Additionally, a comparative extraction was performed in order to determine the effect of low-pH  
275 sodium acetate buffer on reducing the amount of humic substances. The results showed that, in the  
276 sodium acetate-free situation, not only was the amount of humic acid slightly higher but the quality  
277 of the extracted RNA was also less than other situations (Supplementary Table 1). Additionally,  
278 price comparisons revealed that this improved protocol was significantly cheaper than the  
279 commercial kit to obtain high-quality DNA/RNA from soil samples (Supplementary File S1).

#### 280 **Direct RNA sequencing**

281 The primary objective of this study was to improve RNA extraction from organic and mineral soil  
282 for metatranscriptomics studies, so the nanopore direct RNA sequencing kit was chosen for library  
283 preparation. In the first step, 300 ng of each extracted RNA sample from mineral or organic soil  
284 samples was split into two groups, and four libraries with four custom barcodes were prepared and  
285 pooled together. After 24 hours, 306,953 reads with ~215 million bp were sequenced successfully.  
286 The 10.1 mean read quality score with 702 bp mean read length was achieved for the pooled library  
287 (Supplementary Table 2).

#### 288 **Bioinformatics analysis**

##### 289 **Preprocessing the data**

290 First, raw data were base-called, filtered, and demultiplexed, and then the quality of the filtered  
291 reads (274,565) was assessed using the NanoPlot software (Supplementary Fig. 2). For mineral

292 total RNA, mineral mRNA, organic total RNA, and organic mRNA, the total number of megabases  
293 was 52.2, 80.1, 48.6 and 18.1 while the number of reads was 80,219, 108,114, 59,453 and 26,779,  
294 respectively (Table 3). For mineral total RNA, mineral mRNA, organic total RNA, and organic  
295 mRNA, the N50 read lengths were 887, 1087, 1254, and 972 bp, and the maximum read lengths  
296 were 2.9, 3.6, 3.5, and 2.8 kb, respectively. Mineral mRNA and organic total RNA samples  
297 provided many long reads with a median read length of 789 and 658 bp, while mineral total RNA  
298 and organic mRNA samples only provided median read lengths of 560 and 583 bp (Supplementary  
299 File S2).

### 300 **Clustering and taxonomic classification**

301 RATTLE's clustering and correction pipeline constructs a consensus sequence from each cluster  
302 associated with each barcode for taxonomic classification. Total RNA samples from minerals and  
303 organics contained 10.7% and 16.7% of ribosomal RNA (rRNA) clusters, respectively. The rRNA  
304 clusters were retained for taxonomic classification. Mineral and organic rRNA clusters showed  
305 that 77% and 81% of rRNAs belong to the bacteria kingdom, respectively. A large portion of the  
306 bacteria group in mineral soil comes from the Proteobacteria group (45%), while the Terrabacteria  
307 group (42%) dominates in organic soil (Fig. 5 and Supplementary File S3-4).

308 In addition, the remaining non-rRNAs, mineral mRNAs, and organic mRNAs were  
309 taxonomically categorized by Kraken 2. A nucleotide search was performed by Kraken 2 against  
310 the PlusPF database (May 2021). Kraken 2 programs detected a diversity of microorganisms,  
311 including bacteria, Archaea, and fungi in mineral and organic soils (Fig. 6). For example, in the  
312 mineral total RNA sample, seven bacterial phyla were identified, including Actinobacteria,  
313 Bacteroidota, Chloroflexota, Deinococcota, Firmicutes, Planctomycetota, and Proteobacteria. This  
314 sample also contained one fungal phylum, Ascomycota, and two Archaea phyla, Euryarchaeota

310 and Thaumarchaeota. Furthermore, the presence of various proteobacteria, including  
316 *Pseudomonas spp.*, was dominant in both mineral (Fig. 6A and 6B) and organic soil samples (Fig.  
317 6C and 6D). However, just a single cluster was classified as belonging to the virus kingdom  
318 Orthornavirae in the mineral mRNA sample (Fig. 6B).

319         Since approximately 30% of the clusters were not aligned by Kraken 2, the unaligned  
320 clusters were searched against a custom database using Centrifuge. *Acanthamoeba castellanii*, a  
321 free-living soil amoeba, was detected in unaligned clusters of mineral samples (both total RNA  
322 and mRNA) (Supplementary Figs. 3A and 3B). The centrifuge analysis revealed that *Fusarium*  
323 genus was also present in mineral and organic non-hit mRNA clusters (Supplementary Figs. 3B  
324 and 3D).

### 325 **Annotation and functional analysis**

326 As a first step in evaluating and interpreting the content of our metatranscriptomes, we blasted the  
327 clusters and identified ORFs using BLASTx and BLASTp, respectively, against the SwissProt  
328 database with an E-value cut-off set to  $10^{-5}$ . Clusters of Orthologous Groups (COGs) analyses were  
329 performed on both mineral and organic read clusters. In both mineral and organic samples, COGs  
330 related to translation, ribosomal structure, and biogenesis had the highest cluster abundance.  
331 Flagellar biosynthesis-related clusters in organic samples were less expressed than other clusters.  
332 Meanwhile, the lowest level of COGs in mineral cluster was associated with different functions,  
333 including defense mechanisms, intracellular trafficking, secretion, and vesicular transport (Fig. 7).

334         To achieve the community's functioning, gene ontology (GO) classification was taken into  
335 account using SwissProt protein sequences. GO terms are categorized as biological processes,  
336 cellular components, and molecular functions, which describe the properties of a gene product  
337 (Ashburner et al. 2000; Gene Ontology 2004). It was observed that the relative distribution of GO

338 terms across mineral and organic datasets varied, indicating that each mineral and organic sample  
339 was inhabited by a different metabolically active community of microorganisms ( 8).

340 In mineral and organic soil, gene ontology analysis assigned 495 and 288 clusters,  
341 respectively, to one or more GO terms. The three most common categories of biological process  
342 for mineral soils and organic soils were “metabolic process (GO:0008152)” with 120 and 74  
343 clusters, “nitrogen compound metabolic process (GO:0006807)” with 102 and 65 clusters, and  
344 “biosynthetic process (GO:0009058)” with 73 and 45 clusters, respectively. In the category of  
345 cellular components, the three enriched terms with the most clusters in the mineral soil sample  
346 were cytoplasm (GO:0005737), membrane (GO:0016020), and ribosome (GO:0005840). Among  
347 enriched terms within the cellular component category in the organic soil sample, “cytoplasm  
348 (GO:0005737)” ranked first with 28 clusters, followed by “membrane (GO:0016020)” ranking  
349 second with 25 clusters, and “plasma membrane (GO:0005886)” ranking third with 17 clusters.  
350 The three most abundant groups in the molecular function domain for the mineral soil sample were  
351 “catalytic activity (GO:0003824)” with 104 clusters, “ion binding (GO:0043167)” with  
352 91 clusters, and “DNA-binding (GO:0003676)” with 65 clusters. For the molecular function  
353 domain in the organic soil sample, catalytic activity (GO:0003824) was the most abundant group,  
354 with 74 clusters, followed by ions binding (GO:0043167), with 57 clusters, and metal ion binding  
355 (GO:0046872), with 38 clusters (Fig. 8 and Supplementary File S5-6).

356 A total of 359 and 261 numbers of mineral and organic KOs were classified, respectively.  
357 The top three most abundant categories at the BRITE 1 functional hierarchy level were related to  
358 “environmental information processing”, “metabolism”, and “genetic information processing”  
359 with 36.9%, 32.8% and 19.9% of organic KOs and 33%, 29.3% and 17.9% of mineral KOs,



360 respectively. However, a comparison between mineral and organic KOs demonstrated that the  
361 cellular progress category had greater activation in the mineral samples (Fig. 9B).

362 At the BRITE 2 functional hierarchy level, mineral and organic samples showed several  
363 significant differences. The three most abundant categories in the organic samples at the BRITE 2  
364 level were “Drug resistance: Antimicrobial”, “Development”, and “Digestive systems” which  
365 were not present in the mineral sample (Supplementary Fig. 4B). In the mineral sample, the most  
366 abundant categories at the BRITE 2 functional hierarchy level were “Drug resistance:  
367 Antineoplastic”, and “Immune diseases” which were absent in the organic sample. Nevertheless,  
368 the third-highest category was “Cellular community: eukaryotes” which was also activated slightly  
369 in the organic sample (Supplementary Fig. 4B).

370 By using FuncTree 2 (Darzi et al. 2019), functional hierarchies were also visualized at  
371 different levels of the BRITE functional hierarchy (BRITE 1, BRITE 2) and pathway  
372 (Supplementary Fig. 5A). A total of 41 and 42 functional categories from the BRITE 2 level, which  
373 were assigned to six categories at the BRITE 1 level, were activated in the mineral and organic  
374 samples, respectively. A total of 176 and 159 pathways were enriched from mineral and organic  
375 clusters, respectively, and 99 pathways were the same between mineral and organic soil  
376 (Supplementary File S7). For instance, lipid metabolism pathways were enriched specifically in  
377 the organic sample (Supplementary Fig. 6A), while in the mineral sample carbohydrate  
378 metabolism pathways were particularly active (Supplementary Fig. 6B).

## 379 **Discussion**

380 Various methods have been proposed over the last three decades for extracting nucleic acids of  
381 soil microbial populations, and with time, these methods have been refined and improved. Aside  
382 from enhancing efficiency and being responsive to current technology requirements (e.g., quantity

383 and quality), these changes also aimed to address the primary challenges associated with nucleic  
384 acid extraction from soil, such as co-extraction of contaminants, nucleic acid absorption into soil  
385 particles, and use of adequate pH. The nature of RNA and its instability make extracting RNA  
386 from soil more difficult, along with other soil challenges. Consequently, we labored to improve  
387 several existing methods (Angel et al. 2012; Griffiths et al. 2000; Peršoh et al. 2008; Sharma et  
388 al. 2012; Thorn et al. 2019) with modifications based on previous research (Guerra et al. 2020;  
389 Hashizume 2015; Mettel et al. 2010; Wang et al. 2009a; Wang et al. 2009b) to achieve a novel,  
390 and cost-effective RNA extraction method that performed strikingly well in mineral and organic  
391 soils.

392 The method presented was designed to reach two key goals: to (1) prevent the addition of  
393 alkaline pH to the nucleic acid extraction; and (2) prevent the co-extraction of humic acids with  
394 the nucleic acid by performing all extractions on ice. Indeed, processing samples at a low  
395 temperature substantially reduces humic acid carryover, protects RNA from degradation, and  
396 prevents tubes from being accidentally overheated and leaking phenol (Angel et al. 2012). Here, a  
397 CTAB buffer containing PVP (Sharma et al. 2012) was modified to reach a lower pH. However,  
398 it should be noted that while lower pH prevents humic compounds from being extracted, it also  
399 reduces the concentration of nucleic acid, and we observed that pHs below 5.5 significantly  
400 reduced nucleic acid concentration. The use of phosphate buffers separately for extraction has two  
401 benefits: modification of pH levels (according to soil pH and buffer pH) and an increase in  
402 phosphate content in the lysis step, which helps to release nucleic acids from soil particles (Guerra  
403 et al. 2020). Depending on the soil type and pH of the phenol solution used, this step of the  
404 protocol can be adjusted in clay-rich soils by increasing the phosphate molarity (above 150 mM)  
405 without changing the CTAB buffer. On the other hand, if the available phenol had a pH that was

above 6 or below 5, the extraction buffer pH can be modified by changing the pH of the phosphate buffer, which is much safer and simpler than changing the pH of the phenol. We tested a variety of phenols, including citrate-phenol, Tris-saturated phenol, Trizol, and water-saturated phenol with pH 5 and 4 in our pre-experiments, which led us to choose water-saturated phenol with pH 5.8 based on the yield and purity of nucleic acids (data not shown). Low-quality results with the use of these different phenol solutions can be attributed to their salt content (Tris, Citrate, Guanidinium thiocyanate, etc.). Through the addition of the phenol-chloroform step and re-purification of the aqueous phase, we can adjust the amount of DNA using acidic sodium acetate buffer (Chomczynski and Sacchi 2006).

Additionally, our results revealed that sodium acetate could absorb and reduce humic contamination to some extent. Although sodium acetate has been used previously to absorb humic substances (Lafrance and Mazet 1989; Rashid 1969), we found that low-pH sodium acetate helped to decrease humic substances as well as to separate DNA from RNA. However, the effect of sodium acetate on humic acid reduction will need further investigation, because this type of contamination is common in different soil types and different ecosystems (Supplementary Table 1). Contamination is a very critical issue in a lot of molecular biology techniques (e.g., PCR, RT-PCR, macromolecule blotting and probing, sequencing), especially when working with nanopore direct RNA kit, because the RNA must be contamination-free, and the enzymatic steps such as polyadenylation, ligation, and reverse transcription are extremely sensitive.

Indeed, several challenges remain when analyzing nanopore data, and the initial stages are still among the most challenging. This is striking when it comes to working with direct RNA sequencing data since the development of dedicated and user-friendly bioinformatics tools for this purpose is ongoing. To answer this need, we designed in this study an in-house bioinformatics

workflow for taxonomy analysis at different levels. Notably, using the RATTLE Pipeline (de la Rubia et al. 2022), it was possible to avoid misclassifying the reads of species with the least sequencing coverage, one of the common issues when working with long-read assemblers. Thus, using this in-house workflow we analyzed the consensus sequences obtained from the clustering step in the total RNA datasets in terms of rRNA sequences and we completed the taxonomic profiling of the microbial population.

The remaining reads were analyzed by Kraken2 and Centrifuge tools (Kim et al. 2016; Wood et al. 2019). The noteworthy point in this context is Kraken2's insufficient ability to fully classify sequences. However, due to its much higher speed compared to Centrifuge and updated databases, it can still be useful as an early step to obtain the microbiome profile. On the other hand, the Centrifuge needs an updated or dedicated database for the desired project and also requires more time and system resources. Nevertheless, the use of both tools together enabled the loss of sequences without hits to be minimized. The identification of Orthornavirae viruses in the mRNA dataset demonstrates the high performance of the RNA enrichment method to capture mRNA from low-relative-abundance microbial species (Fig. 6B), especially for viruses that have polyA-tailed mRNA (Brinton et al. 2021; Lang et al. 2021; Walker et al. 2021).

A major advantage of using RNA datasets is that it allows for functional analysis and annotation to be performed. The importance of this issue becomes even more apparent when dealing with soil environments, because it allows for determining the active functional profile in the microbiome (which cannot always be determined by examining DNA) and, ultimately, better understanding the plant-soil interaction. In addition to the difference in their microbial profile the annotation results (GO, KEGG, and COG analysis) showed a higher functional activity in the mineral soil than in the organic one. However, this difference in functional activity maybe driven

452 by the number of clusters and reads obtained from these two types of soil. Indeed, organic soil also  
453 showed greater activity in “Cell wall/membrane/envelope biogenesis”, “Lipid transport and  
454 metabolism”, and “Transcription” groups (Fig. 7). Therefore, RNA nanopore sequencing results  
455 should be combined with short reads sequencing results of the same samples to obtain a suitable  
456 coverage for accurate functional analysis of genes with low expression frequency.

## 457 **Conclusion**

458 Several of the challenges associated with soil nucleic acid extraction have been addressed by the  
459 development of soil nucleic acid extraction kits. However, due to the high cost of kits for projects  
460 that require a large number of samples, as well as the impossibility of optimizing these kits for  
461 different types of soils, manual methods have continued to be of great interest. We present a new  
462 improved method to extract RNA from soil, which combines the strengths of the previously  
463 developed methods, but also adds steps to adjust the amount of DNA and increase the quality and  
464 quantity of extracted material in two soil types (mineral and organic). As a result of using nanopore  
465 direct RNA sequencing, it was possible to confirm the high quality and purity of the final product.  
466 Furthermore, an optimal workflow for sequencing data clustering, taxonomy analysis, and  
467 functional annotation has been proposed and evaluated. To our knowledge, this work breaks  
468 ground by sequencing soil RNA with direct RNA nanopore sequencing and most conveniently  
469 proposes an in-house bioinformatics workflow necessary to process this type of dataset. In this  
470 third-generation sequencing era, the yield, quality and purity of the RNA obtain from this  
471 improved cost-effective method open the door to decipher the soil microbial functionalities using  
472 nanopore sequencing technology. Moreover, we proposed a strong and straightforward  
473 bioinformatics workflow to analysis the nanopore sequencing data resulting from this improved  
474 RNA extraction method.

ε70 **Acknowledgment**

ε76 The authors gratefully acknowledge Pierre Lemoyne, Azza Larafa and Dong Xu from Agriculture  
ε77 and Agri-Food Canada's Saint-Jean-sur-Richelieu Research and Development Centre (CRDH) for  
ε78 their support and help on soil sampling and processing. The authors would like to thank Dave  
ε79 Thibouthot-Ste-Croix, from the nematology lab. of the CRDH, for his technical support on  
ε80 nanopore sequencing and Joel Lafond-Lapalme, our team leader in bioinformatics, for his  
ε81 assistance for finding and resolving bugs.

ε82 **Literature cited**

ε83 Aguiar-Pulido, V., Huang, W., Suarez-Ulloa, V., Cickovski, T., Mathee, K., and Narasimhan, G.  
ε84 2016. Metagenomics, Metatranscriptomics, and Metabolomics Approaches for  
ε85 Microbiome Analysis: Supplementary Issue: Bioinformatics Methods and Applications for  
ε86 Big Metagenomics Data. *Evolutionary Bioinformatics* 12s1:EBO.S36436.

ε87 Alm Elizabeth, W., Zheng, D., and Raskin, L. 2000. The Presence of Humic Substances and DNA  
ε88 in RNA Extracts Affects Hybridization Results. *Applied and Environmental Microbiology*  
ε89 66:4547-4554.

ε90 Altschul, S. F., Gish, W., Miller, W., Myers, E. W., and Lipman, D. J. 1990. Basic local alignment  
ε91 search tool. *Journal of Molecular Biology* 215:403-410.

ε92 Angel, R., Claus, P., and Conrad, R. 2012. Methanogenic archaea are globally ubiquitous in  
ε93 aerated soils and become active under wet anoxic conditions. *The ISME Journal* 6:847-  
ε94 862.

ε95 Ashburner, M., Ball, C. A., Blake, J. A., Botstein, D., Butler, H., Cherry, J. M., Davis, A. P.,  
ε96 Dolinski, K., Dwight, S. S., Eppig, J. T., Harris, M. A., Hill, D. P., Issel-Tarver, L.,  
ε97 Kasarskis, A., Lewis, S., Matese, J. C., Richardson, J. E., Ringwald, M., Rubin, G. M., and

- 498 Sherlock, G. 2000. Gene Ontology: tool for the unification of biology. *Nature Genetics*  
499 25:25-29.
- 500 Azeem, M., Soundari, P. G., Ali, A., Tahir, M. I., Imran, M., Bashir, S., Irfan, M., Li, G., Zhu, Y.-  
501 G., and Zhang, Z. 2021. Soil metaphenomics: a step forward in metagenomics. *Archives*  
502 *of Agronomy and Soil Science*:1-19.
- 503 Bairoch, A., and Apweiler, R. 1997. The SWISS-PROT protein sequence data bank and its  
504 supplement TrEMBL. *Nucleic Acids Research* 25:31-36.
- 505 Breitwieser, F. P., and Salzberg, S. L. 2020. Pavian: interactive analysis of metagenomics data for  
506 microbiome studies and pathogen identification. *Bioinformatics* 36:1303-1304.
- 507 Brinton, M. A., Gulyaeva, A. A., Balasuriya, U. B. R., Dunowska, M., Faaberg, K. S., Goldberg,  
508 T., Leung, F. C. C., Nauwynck, H. J., Snijder, E. J., and Stadejek, T. 2021. ICTV virus  
509 taxonomy profile: Arteriviridae 2021. *The Journal of General Virology* 102.
- 510 Cantalapiedra, C. P., Hernández-Plaza, A., Letunic, I., Bork, P., and Huerta-Cepas, J. 2021.  
511 eggNOG-mapper v2: Functional Annotation, Orthology Assignments, and Domain  
512 Prediction at the Metagenomic Scale. *Molecular Biology and Evolution* 38:5825-5829.
- 513 Cavicchioli, R., Ripple, W. J., Timmis, K. N., Azam, F., Bakken, L. R., Baylis, M., Behrenfeld,  
514 M. J., Boetius, A., Boyd, P. W., Classen, A. T., Crowther, T. W., Danovaro, R., Foreman,  
515 C. M., Huisman, J., Hutchins, D. A., Jansson, J. K., Karl, D. M., Koskella, B., Mark Welch,  
516 D. B., Martiny, J. B. H., Moran, M. A., Orphan, V. J., Reay, D. S., Remais, J. V., Rich, V.  
517 I., Singh, B. K., Stein, L. Y., Stewart, F. J., Sullivan, M. B., van Oppen, M. J. H., Weaver,  
518 S. C., Webb, E. A., and Webster, N. S. 2019. Scientists' warning to humanity:  
519 microorganisms and climate change. *Nature Reviews Microbiology* 17:569-586.

- 020 Chaparro-Encinas, L. A., Arellano-Wattenbarger, G. L., Parra-Cota, F. I., and de los Santos-  
021 Villalobos, S. 2020. A modified CTAB and Trizol® protocol for high-quality RNA  
022 extraction from whole wheat seedlings, including rhizosphere. *Cereal Research*  
023 *Communications* 48:275-282.
- 024 Chomczynski, P., and Sacchi, N. 2006. The single-step method of RNA isolation by acid  
025 guanidinium thiocyanate–phenol–chloroform extraction: twenty-something years on.  
026 *Nature Protocols* 1:581-585.
- 027 Darzi, Y., Yamate, Y., and Yamada, T. 2019. FuncTree2: an interactive radial tree for functional  
028 hierarchies and omics data visualization. *Bioinformatics* 35:4519-4521.
- 029 De Coster, W., D’Hert, S., Schultz, D. T., Cruts, M., and Van Broeckhoven, C. 2018. NanoPack:  
030 visualizing and processing long-read sequencing data. *Bioinformatics* 34:2666-2669.
- 031 de la Rubia, I., Srivastava, A., Xue, W., Indi, J. A., Carbonell-Sala, S., Lagarde, J., Albà, M. M.,  
032 and Eyra, E. 2022. RATTLE: Reference-free reconstruction and quantification of  
033 transcriptomes from Nanopore sequencing. *bioRxiv:2020.2002.2008.939942*.
- 034 Deutscher, M. P. 2006. Degradation of RNA in bacteria: comparison of mRNA and stable RNA.  
035 *Nucleic Acids Research* 34:659-666.
- 036 Fischer, M., Renevey, N., Thür, B., Hoffmann, D., Beer, M., and Hoffmann, B. 2016. Efficacy  
037 Assessment of Nucleic Acid Decontamination Reagents Used in Molecular Diagnostic  
038 Laboratories. *PLOS ONE* 11:e0159274.
- 039 Gene Ontology, C. 2004. The Gene Ontology (GO) database and informatics resource. *Nucleic*  
040 *Acids Research* 32:D258-D261.
- 041 Goring, C. A. I., and Bartholomew, W. V. 1952. ADSORPTION OF MONONUCLEOTIDES,  
042 NUCLEIC ACIDS, AND NUCLEOPROTEINS BY CLAYS. *Soil Science* 74.



- 053 Griffiths, R. I., Whiteley, A. S., O'Donnell, A. G., and Bailey, M. J. 2000. Rapid method for  
054 coextraction of DNA and RNA from natural environments for analysis of ribosomal DNA-  
055 and rRNA-based microbial community composition. *Applied and Environmental*  
056 *Microbiology* 66:5488-5491.
- 057 Guerra, V., Beule, L., Lehtsaar, E., Liao, H.-L., and Karlovsky, P. 2020. Improved Protocol for  
058 DNA Extraction from Subsoils Using Phosphate Lysis Buffer. *Microorganisms* 8.
- 059 Hashizume, H. 2015. Adsorption of Nucleic Acid Bases, Ribose, and Phosphate by Some Clay  
060 Minerals. *Life* 5.
- 061 Hayden, H. L., Savin, K. W., Wadeson, J., Gupta, V. V. S. R., and Mele, P. M. 2018. Comparative  
062 Metatranscriptomics of Wheat Rhizosphere Microbiomes in Disease Suppressive and Non-  
063 suppressive Soils for *Rhizoctonia solani* AG8. *Frontiers in Microbiology* 9.
- 064 Huerta-Cepas, J., Szklarczyk, D., Heller, D., Hernández-Plaza, A., Forslund, S. K., Cook, H.,  
065 Mende, D. R., Letunic, I., Rattei, T., Jensen, Lars J., von Mering, C., and Bork, P. 2019.  
066 eggNOG 5.0: a hierarchical, functionally and phylogenetically annotated orthology  
067 resource based on 5090 organisms and 2502 viruses. *Nucleic Acids Research* 47:D309-  
068 D314.
- 069 Jansson, J. K., and Hofmockel, K. S. 2020. Soil microbiomes and climate change. *Nature Reviews*  
070 *Microbiology* 18:35-46.
- 071 Kanehisa, M., and Goto, S. 2000. KEGG: Kyoto Encyclopedia of Genes and Genomes. *Nucleic*  
072 *Acids Research* 28:27-30.
- 073 Kim, D., Song, L., Breitwieser, F. P., and Salzberg, S. L. 2016. Centrifuge: rapid and sensitive  
074 classification of metagenomic sequences. *Genome Research* 26:1721-1729.

- 060 Kopylova, E., Noé, L., and Touzet, H. 2012. SortMeRNA: fast and accurate filtering of ribosomal  
066 RNAs in metatranscriptomic data. *Bioinformatics* 28:3211-3217.
- 067 Lafrance, P., and Mazet, M. 1989. Adsorption of Humic Substances in the Presence of Sodium  
068 Salts. *Journal AWWA* 81:155-162.
- 069 Lang, A. S., Vlok, M., Culley, A. I., Suttle, C. A., Takao, Y., Tomaru, Y., and Consortium, I. R.  
070 2021. ICTV virus taxonomy profile: Marnaviridae 2021. *The Journal of General Virology*  
071 102.
- 072 Lever, M. A., Torti, A., Eickenbusch, P., Michaud, A. B., Šantl-Temkiv, T., and Jørgensen, B. B.  
073 2015. A modular method for the extraction of DNA and RNA, and the separation of DNA  
074 pools from diverse environmental sample types. *Frontiers in Microbiology* 6.
- 075 Lim, N. Y. N., Roco, C. A., and Frostegård, Å. 2016. Transparent DNA/RNA Co-extraction  
076 Workflow Protocol Suitable for Inhibitor-Rich Environmental Samples That Focuses on  
077 Complete DNA Removal for Transcriptomic Analyses. *Frontiers in Microbiology* 7.
- 078 Martí, J. M. 2019. Recentrifuge: Robust comparative analysis and contamination removal for  
079 metagenomics. *PLOS Computational Biology* 15:e1006967.
- 080 Mehlich, A. 1984. Mehlich 3 soil test extractant: A modification of Mehlich 2 extractant.  
081 *Communications in Soil Science and Plant Analysis* 15:1409-1416.
- 082 Mettel, C., Kim, Y., Shrestha Pravin, M., and Liesack, W. 2010. Extraction of mRNA from Soil.  
083 *Applied and Environmental Microbiology* 76:5995-6000.
- 084 Paulin, M. M., Nicolaisen, M. H., Jacobsen, C. S., Gimsing, A. L., Sørensen, J., and Bælum, J.  
085 2013. Improving Griffith's protocol for co-extraction of microbial DNA and RNA in  
086 adsorptive soils. *Soil Biology and Biochemistry* 63:37-49.

- 087 Pei, Y., Mamtimin, T., Ji, J., Khan, A., Kakade, A., Zhou, T., Yu, Z., Zain, H., Yang, W., Ling,  
088 Z., Zhang, W., Zhang, Y., and Li, X. 2021. The guanidine thiocyanate-high EDTA method  
089 for total microbial RNA extraction from severely heavy metal-contaminated soils.  
090 *Microbial Biotechnology* 14:465-478.
- 091 Peršoh, D., Theuerl, S., Buscot, F., and Rambold, G. 2008. Towards a universally adaptable  
092 method for quantitative extraction of high-purity nucleic acids from soil. *Journal of*  
093 *Microbiological Methods* 75:19-24.
- 094 Podolyan, A., and Grelet, G.-A. 2021. Suitability of six extraction methods for isolating a large  
095 quantity of high-quality RNA from New Zealand free-draining stony soil. *New Zealand*  
096 *Journal of Agricultural Research* 64:565-575.
- 097 Poursalavati, A., Rashidi-Monfared, S., and Ebrahimi, A. 2021. Toward understanding of the  
098 methoxylated flavonoid biosynthesis pathway in *Dracocephalum kotschyi* Boiss. *Scientific*  
099 *Reports* 11:19549.
- 100 Qin, H., Chen, X., Tang, Y., Hou, H., Sheng, R., and Shen, J. 2016. Modified method for  
101 the extraction of mRNA from paddy soils. *Biotechnology Letters* 38:2163-2167.
- 102 Quast, C., Pruesse, E., Yilmaz, P., Gerken, J., Schweer, T., Yarza, P., Peplies, J., and Glöckner, F.  
103 O. 2013. The SILVA ribosomal RNA gene database project: improved data processing and  
104 web-based tools. *Nucleic Acids Research* 41:D590-D596.
- 105 Rajarapu, S. P., Shreve, J. T., Bhide, K. P., Thimmapuram, J., and Scharf, M. E. 2015.  
106 Metatranscriptomic profiles of Eastern subterranean termites, *Reticulitermes flavipes*  
107 (Kollar) fed on second generation feedstocks. *BMC Genomics* 16:332.
- 108 Ranjan, K., Bharti, M. K., Siddique, R. A., and Singh, J. 2021. Metatranscriptomics in Microbiome  
109 Study: A Comprehensive Approach. Pages 1-36 in: *Microbial Metatranscriptomics*

- 610 Belowground. M. Nath, D. Bhatt, P. Bhargava and D. K. Choudhary, eds. Springer  
611 Singapore, Singapore.
- 612 Rashid, M. 1969. Contribution of Humic Substances to the Cation Exchange Capacity of Different  
613 Marine Sediments. *Atlantic Geology* 5:44-50.
- 614 Shakya, M., Lo, C.-C., and Chain, P. S. G. 2019. Advances and Challenges in Metatranscriptomic  
615 Analysis. *Frontiers in Genetics* 10.
- 616 Sharma, S., Mehta, R., Gupta, R., and Schloter, M. 2012. Improved protocol for the extraction of  
617 bacterial mRNA from soils. *Journal of Microbiological Methods* 91:62-64.
- 618 Sharuddin, S. S., Ramli, N., Yusoff, M. Z., Muhammad, N. A., Ho, L. S., and Maeda, T. 2022.  
619 Advancement of Metatranscriptomics towards Productive Agriculture and Sustainable  
620 Environment: A Review. *International Journal of Molecular Sciences* 23.
- 621 Shen, W., Le, S., Li, Y., and Hu, F. 2016. SeqKit: A Cross-Platform and Ultrafast Toolkit for  
622 FASTA/Q File Manipulation. *PLOS ONE* 11:e0163962.
- 623 Smith, M. A., Ersavas, T., Ferguson, J. M., Liu, H., Lucas, M. C., Begik, O., Bojarski, L., Barton,  
624 K., and Novoa, E. M. 2020. Molecular barcoding of native RNAs using nanopore  
625 sequencing and deep learning. *Genome Research* 30:1345-1353.
- 626 Steglich, C., Lindell, D., Futschik, M., Rector, T., Steen, R., and Chisholm, S. W. 2010. Short  
627 RNA half-lives in the slow-growing marine cyanobacterium *Prochlorococcus*. *Genome*  
628 *Biology* 11:R54.
- 629 Tatusov, R. L., Galperin, M. Y., Natale, D. A., and Koonin, E. V. 2000. The COG database: a tool  
630 for genome-scale analysis of protein functions and evolution. *Nucleic Acids Research*  
631 28:33-36.

- 732 Thorn, C. E., Bergesch, C., Joyce, A., Sambrano, G., McDonnell, K., Brennan, F., Heyer, R.,  
733 Benndorf, D., and Abram, F. 2019. A robust, cost-effective method for DNA, RNA and  
734 protein co-extraction from soil, other complex microbiomes and pure cultures. *Molecular*  
735 *Ecology Resources* 19:439-455.
- 736 Walker, P. J., Cowley, J. A., Dong, X., Huang, J., Moody, N., Ziebuhr, J., and Consortium, I. R.  
737 J. T. J. o. G. V. 2021. ICTV Virus Taxonomy Profile: Roniviridae. 102.
- 738 Wang, Y., and Fujii, T. 2011. Evaluation of Methods of Determining Humic Acids in Nucleic Acid  
739 Samples for Molecular Biological Analysis. *Bioscience, Biotechnology, and Biochemistry*  
740 75:355-357.
- 741 Wang, Y., Hayatsu, M., and Fujii, T. 2009a. Extraction of bacterial RNA from soil: challenges and  
742 solutions. *Microbes and environments*:1202170350-1202170350.
- 743 Wang, Y., Hayatsu, M., and Fujii, T. 2012a. Extraction of Bacterial RNA from Soil: Challenges  
744 and Solutions. *Microbes and Environments* 27:111-121.
- 745 Wang, Y., Morimoto, S., Ogawa, N., Oomori, T., and Fujii, T. 2009b. An improved method to  
746 extract RNA from soil with efficient removal of humic acids. *Journal of Applied*  
747 *microbiology* 107:1168-1177.
- 748 Wang, Y., Nagaoka, K., Hayatsu, M., Sakai, Y., Tago, K., Asakawa, S., and Fujii, T. 2012b. A  
749 novel method for RNA extraction from Andosols using casein and its application to amoA  
750 gene expression study in soil. *Applied Microbiology and Biotechnology* 96:793-802.
- 751 Wang, Z., Gerstein, M., and Snyder, M. 2009c. RNA-Seq: a revolutionary tool for transcriptomics.  
752 *Nature Reviews Genetics* 10:57-63.
- 753 Wilson, I. G. 1997. Inhibition and facilitation of nucleic acid amplification. *Applied and*  
754 *Environmental Microbiology* 63:3741-3751.

- 700 Wnuk, E., Waśko, A., Walkiewicz, A., Bartmiński, P., Bejger, R., Mielnik, L., and Bieganski,  
706 A. 2020. The effects of humic substances on DNA isolation from soils. *PeerJ* 8:e9378.
- 707 Wood, D. E., Lu, J., and Langmead, B. 2019. Improved metagenomic analysis with Kraken 2.  
708 *Genome Biology* 20:257.
- 709 Xu, L., Sun, L., Guan, G., Huang, Q., Lv, J., Yan, L., Ling, L., and Zhang, Y. 2019. The effects of  
710 pH and salts on nucleic acid partitioning during phenol extraction. *Nucleosides,  
711 Nucleotides & Nucleic Acids* 38:305-320.
- 712 Zipper, H., Buta, C., Lämmle, K., Brunner, H., Bernhagen, J., and Vitzthum, F. 2003. Mechanisms  
713 underlying the impact of humic acids on DNA quantification by SYBR Green I and  
714 consequences for the analysis of soils and aquatic sediments. *Nucleic Acids Research*  
715 31:e39-e39.
- 716 Zuñiga, C., Zaramela, L., and Zengler, K. 2017. Elucidation of complexity and prediction of  
717 interactions in microbial communities. *Microbial Biotechnology* 10:1500-1522.
- 718

٦٦٩ Table 1. Physicochemical characteristics of mineral and organic soil samples

| Properties      | Units    | Mineral soils |      |      |      | Organic soils |       |       |       |
|-----------------|----------|---------------|------|------|------|---------------|-------|-------|-------|
|                 |          | S1            | S2   | S3   | S4   | S1            | S2    | S3    | S4    |
| pH              | -        | 5.6           | 5.5  | 5.4  | 5.2  | 6.5           | 6.0   | 6.4   | 6.8   |
| Organic content | %        | 5.4           | 5.5  | 5.4  | 5.2  | 72.3          | 73.7  | 71.7  | 67.6  |
| Organic carbon  | %        | 4.8           | 4.8  | 4.8  | 4.8  | 45.2          | 45.2  | 45.2  | 45.2  |
| CEC             | meq/100g | 16.7          | 17.0 | 17.6 | 15.4 | 31.0          | 36.4  | 34.4  | 34.6  |
| P               | kg/ha    | 72            | 56   | 39   | 39   | 38            | 49    | 35    | 26    |
| K               | kg/ha    | 101           | 98   | 133  | 156  | 208           | 279   | 236   | 129   |
| Ca              | kg/ha    | 3236          | 3046 | 2697 | 1839 | 10636         | 10532 | 11069 | 12356 |
| Mg              | kg/ha    | 142           | 135  | 169  | 106  | 668           | 719   | 670   | 646   |
| Al              | ppm      | 994           | 1042 | 1143 | 1176 | 26            | 29    | 41    | 51    |
| Mn              | ppm      | 49.2          | 39.7 | 39.0 | 36.4 | 5.4           | 5.4   | 5.0   | 5.5   |
| Cu              | ppm      | 2.29          | 2.02 | 2.41 | 3.45 | 3.25          | 5.26  | 3.94  | 3.34  |
| Zn              | ppm      | 2.27          | 2.08 | 2.13 | 2.04 | 9.41          | 15.88 | 41.42 | 77.62 |
| B               | ppm      | 0.43          | 0.33 | 0.39 | 0.38 | 1.20          | 1.24  | 1.34  | 1.47  |
| Fe              | ppm      | 193           | 194  | 164  | 188  | 199           | 196   | 178   | 164   |

Table 2. Qualitative and quantitative properties of total RNA extracted from mineral and organic soil samples using five different extraction methods

| Protocol                | Sample ID | Nucleic Acid (ng/μl) | 260/280 | 260/230 | A400 nm | Qubit RNA (ng/μl) | Qubit DNA (ng/μl) |
|-------------------------|-----------|----------------------|---------|---------|---------|-------------------|-------------------|
| Griffiths <i>et al.</i> | Organic   | 24.7                 | 1.51    | 0.89    | 0.09    | 2.01              | 17.1              |
|                         | Mineral   | 27.3                 | 1.69    | 1.42    | 0.078   | 3.23              | 21                |
| Angel <i>et al.</i>     | Organic   | 23.4                 | 1.73    | 1.12    | 0.019   | 3.02              | 16                |
|                         | Mineral   | 36                   | 1.8     | 1.59    | 0.013   | 3.9               | 23.1              |
| Thorn <i>et al.</i>     | Organic   | 23                   | 1.58    | 0.79    | 0.021   | 2.22              | 15.63             |
|                         | Mineral   | 25                   | 1.79    | 1.23    | 0.018   | 2.9               | 18.2              |
| Sharma <i>et al.</i>    | Organic   | 27                   | 1.8     | 1.58    | 0.02    | 2.1               | 19.1              |
|                         | Mineral   | 29                   | 1.86    | 1.68    | 0.011   | 3.08              | 21.97             |
| Improved method         | Organic   | 56.6                 | 1.82    | 1.79    | 0.006   | 9.3               | 39.8              |
|                         | Mineral   | 78                   | 1.89    | 1.98    | 0.004   | 11.2              | 61.2              |

673

674



Table 3. Summary of direct RNA sequencing results for mineral and organic soil samples

| Sample           | Trimmed<br>(n <sup>5</sup> ) | Total<br>bases | Read length |         |         |
|------------------|------------------------------|----------------|-------------|---------|---------|
|                  |                              |                | Minimum     | Average | Maximum |
| MTR <sup>1</sup> | 80,219                       | 52,496,760     | 36          | 654     | 2945    |
| OTR <sup>2</sup> | 59,453                       | 48,640,361     | 2           | 818     | 3575    |
| MMR <sup>3</sup> | 108,114                      | 80,095,001     | 25          | 740     | 3602    |
| OMR <sup>4</sup> | 26,779                       | 18,138,860     | 11          | 677     | 2825    |

1. Mineral total RNA; 2. Organic total RNA; 3. Mineral mRNA; 4. Organic mRNA; 5.

Number of read

۶۷۸

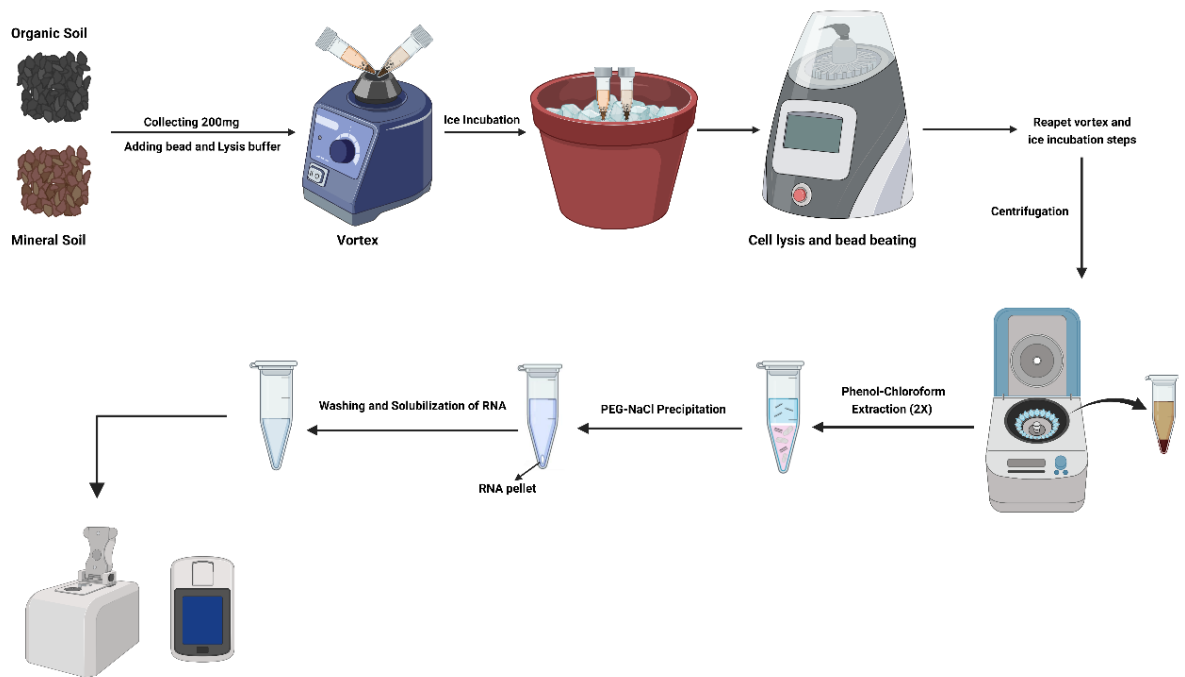

۶۷۹

۶۸۰ Fig. 1. The workflow of total RNA extraction from two types of soils (mineral and organic) using

۶۸۱ the improved RNA extraction method

۶۸۲

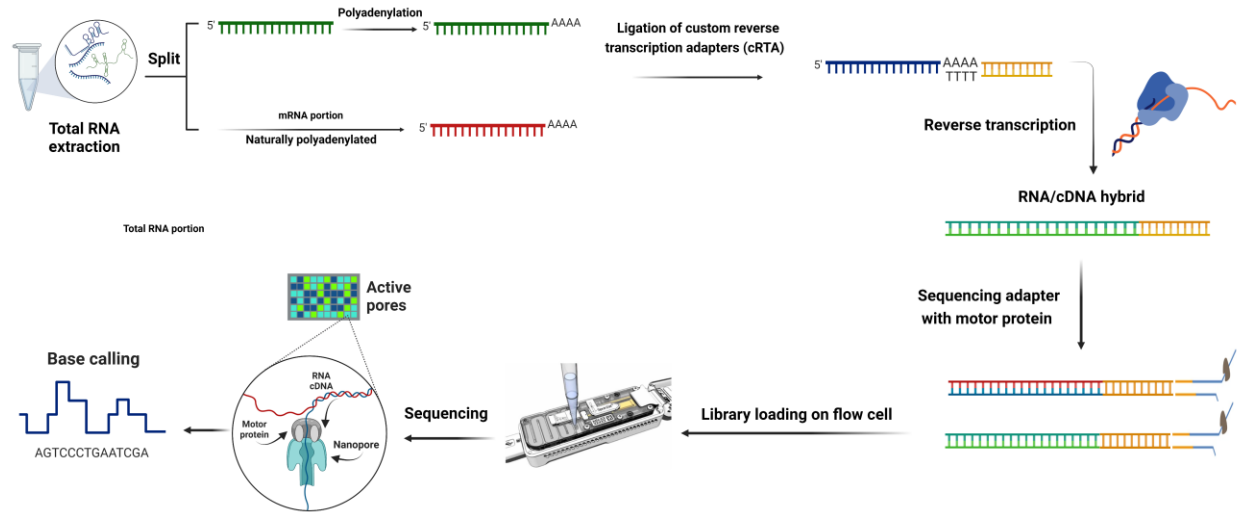

٦٨٣

٦٨٤ Fig. 2. The library and sequencing workflow of direct RNA nanopore sequencing for organic and

٦٨٥ mineral soil samples. Ligation is done in two steps: first, cRTA adapters are ligated to all poly-A

٦٨٦ sequences, then cDNA strand is synthesized to form hybrid RNA/cDNA. In the second stage, the

٦٨٧ sequencing adapter (along with the motor protein) is ligated to the hybrid sequences. When the

٦٨٨ motor protein is connected to the nanopore protein, only the RNA strand passes through the pore,

٦٨٩ and the native RNA is sequenced.

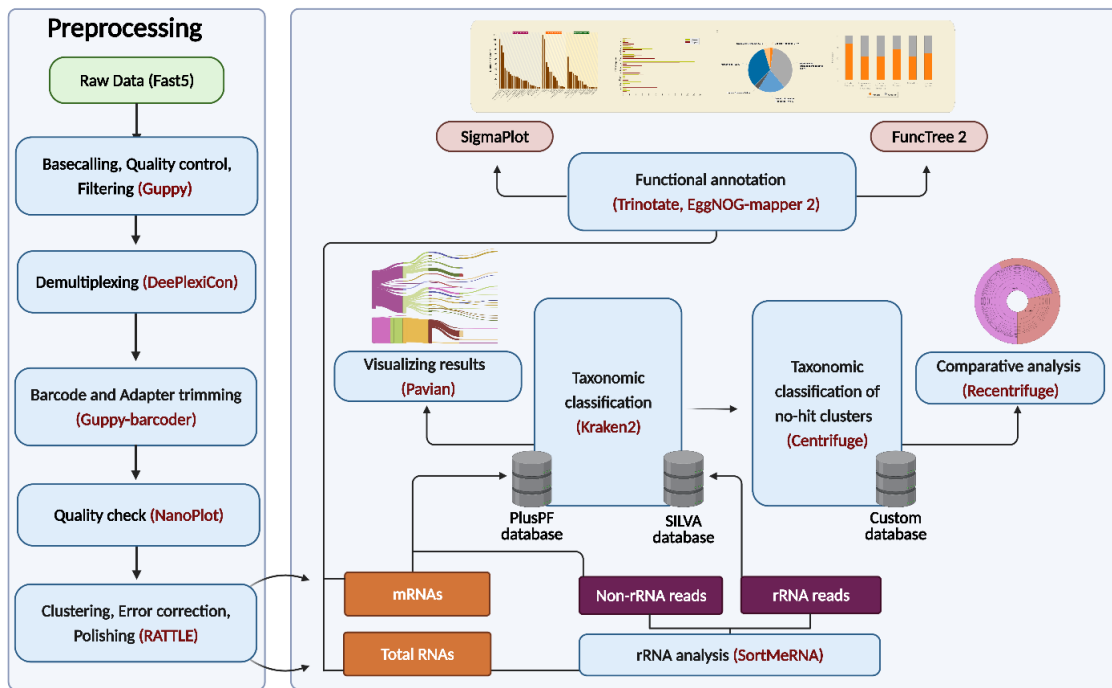

790  
791 Fig. 3. Metatranscriptomic data analysis workflow for direct RNA nanopore sequencing data.  
792 Following preprocessing and demultiplexing of the data, RATTLE pipeline was used for read  
793 clustering, error correction, and creating consensus transcripts for each cluster. Using  
794 SortMeRNA, ribosomal RNA was identified, and then rRNA-free data and ribosomal reads were  
795 separately analyzed with Kraken2 (via PlusPF and SILVA databases). Clusters without hit were  
796 extracted and further analyzed using custom-built databases with the Centrifuge tool. Recentrifuge  
797 and Pavian were used to visual inspection of taxonomy analysis. A functional annotation of the  
798 data was performed using Trinotate and EggNOG-mapper 2, and the data was visualized using  
799 FuncTree 2 and SigmaPlot.

800

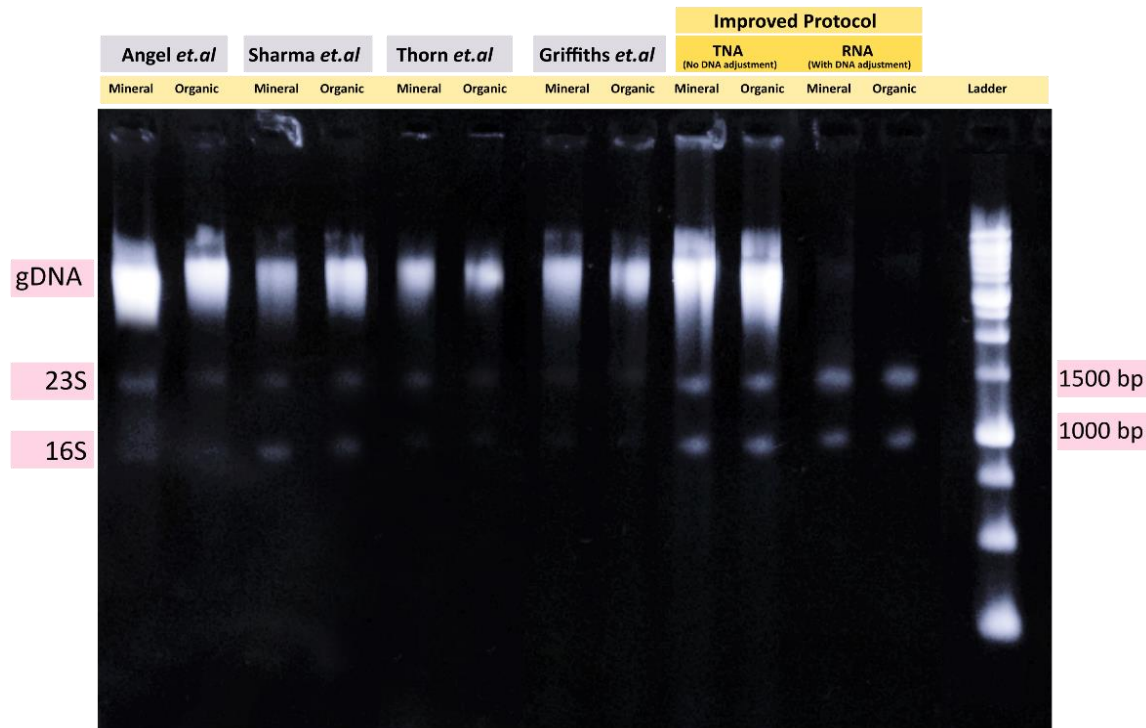

۷۰۱

۷۰۲ Fig. 4. Gel electrophoresis of extracted RNA and total nucleic acid (TNA) following four existing  
۷۰۳ methods (Griffiths *et al.* (Griffiths *et al.* 2000), Thorn *et al.* (Thorn *et al.* 2019), Sharma *et al.*  
۷۰۴ (Sharma *et al.* 2012), and Angel *et al.* (Angel *et al.* 2012)) and the improved method from mineral  
۷۰۵ and organic soil. In the four wells on the right side, total RNA extraction with DNA adjustment  
۷۰۶ (using low-pH sodium acetate buffer) as well as TNA (without adjusting DNA) using the improved  
۷۰۷ method loaded. The nucleic acids were visualized on 1% agarose-SB gel.

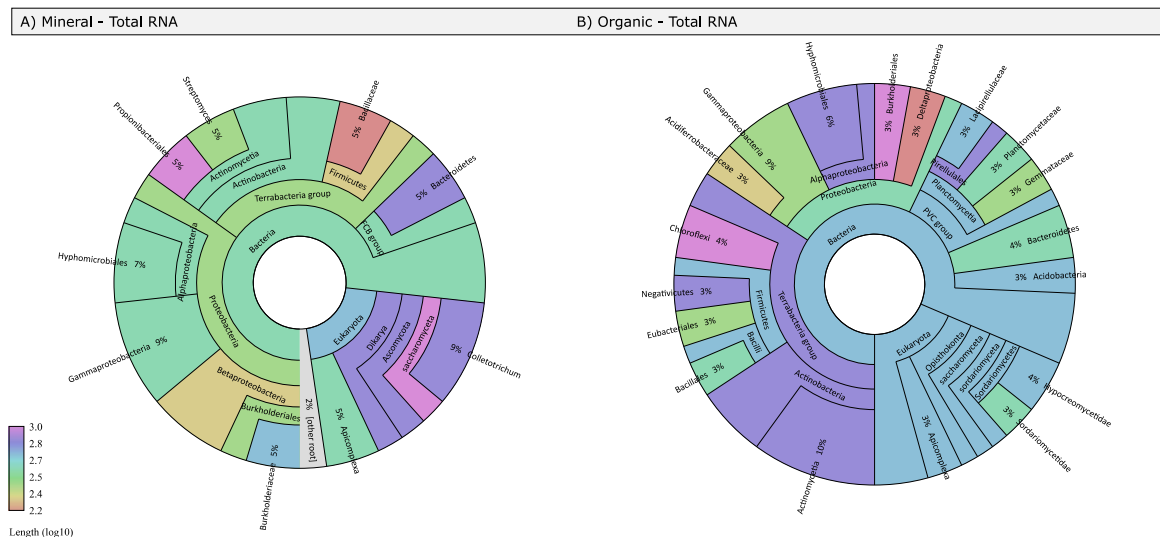

708  
 709 Fig. 5. Taxonomic plots for mineral rRNA (A), organic rRNA (B). The comparative analysis and  
 710 visualization of results were done by Recentrifuge. Based on its developer's suggestion for  
 711 nanopore sequencing reads, the LOGLENGTH was considered as a scoring scheme (Martí 2019).  
 712 For detailed prospection of the results, interactive graphs are available in the supplementary  
 713 materials (Supplementary File S3-4).

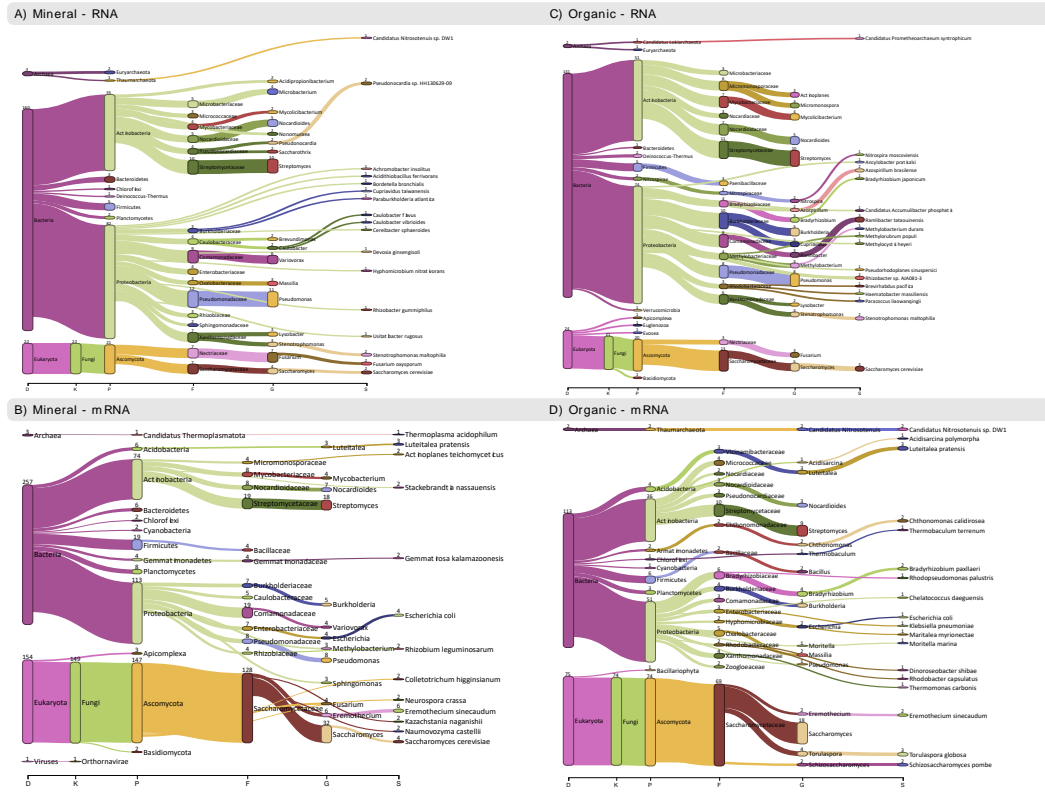

٧١٤

٧١٥ Fig. 6. Taxonomical classification of mineral and organic soil metatranscriptomes at various  
٧١٦ levels: kingdom (K), phylum (P), class (C), order (O), family (F), and genus (G). Visualization of  
٧١٧ results was done using Pavian (Breitwieser and Salzberg 2020).

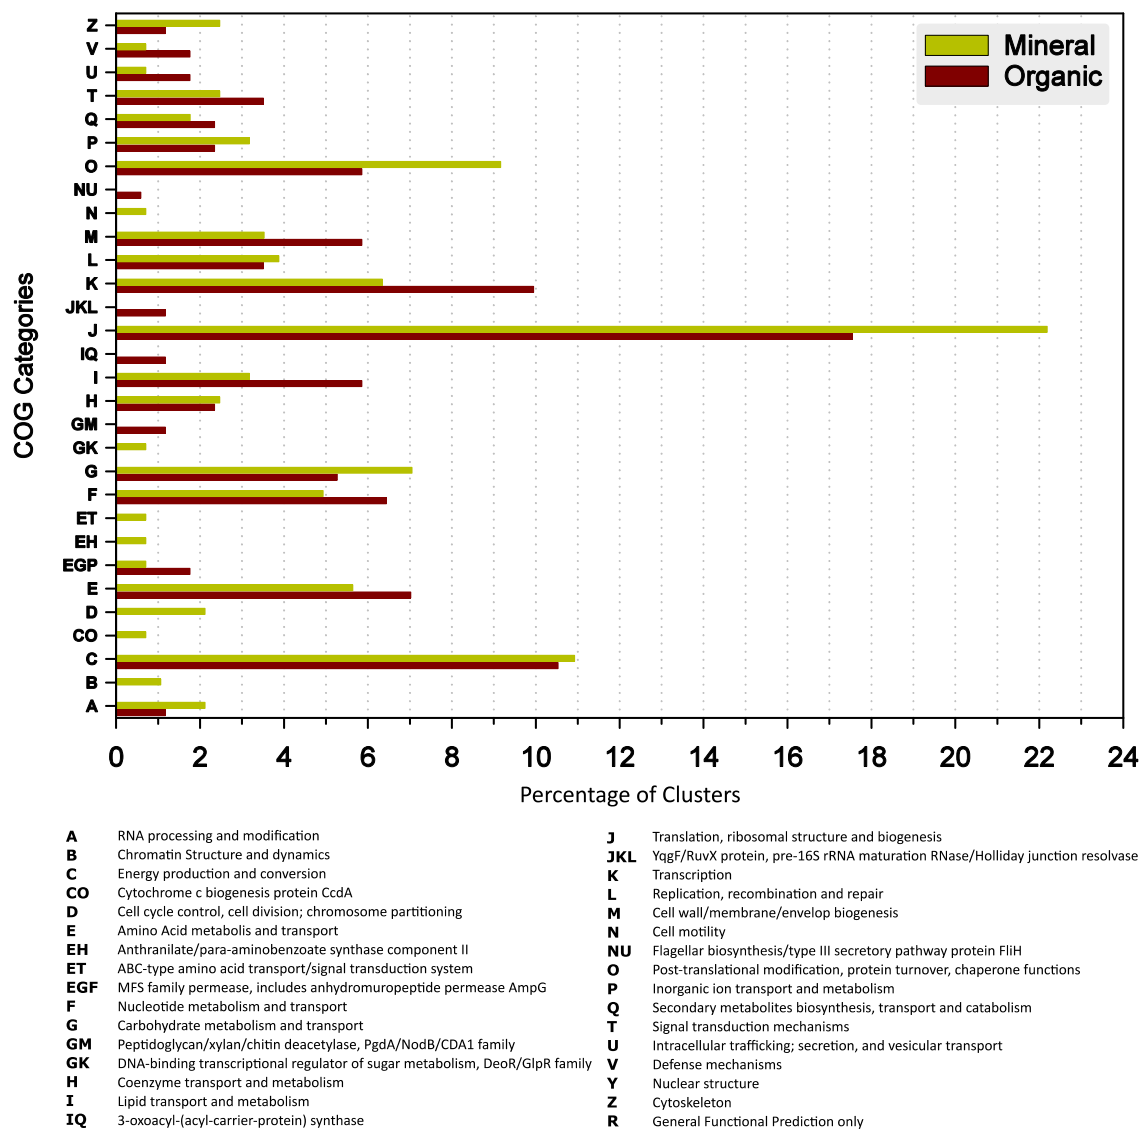

٧١٨

٧١٩ Fig. 7. Functional classification of Cluster of Orthologous Groups (COG) on mineral and organic  
 ٧٢٠ clusters. Classification extracted from eggNOG-mapper2 functional analysis (Cantalapiedra et al.  
 ٧٢١ 2021). 336 mineral clusters and 221 organic clusters were assigned to 30 COG categories.  
 ٧٢٢ Functional classes reflect specific genes and metabolisms, as well as environmental factors. The  
 ٧٢٣ results were visualized by Sigmaplot v14.5 (Systat Software, San Jose, CA) and Inkscape  
 ٧٢٤ (<https://inkscape.org>).



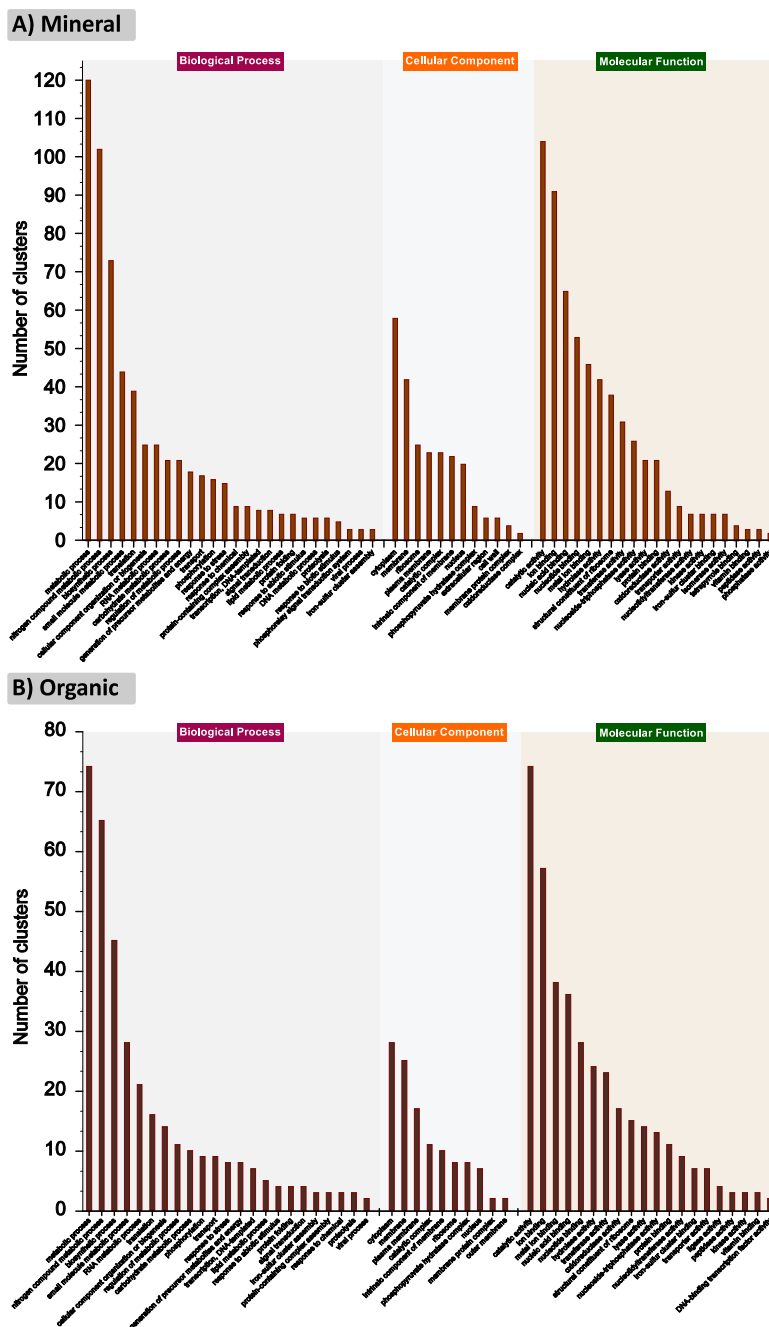

۷۲۵

۷۲۶ Fig. 8. Gene ontology enrichment analysis of mineral and organic clusters. There are three  
۷۲۷ categories of gene ontology terms for each mineral (A) and organic (B) cluster: biological  
۷۲۸ processes, cellular components, and molecular functions. The results were visualized by Sigmaplot  
۷۲۹ v14.5 (Systat Software, San Jose, CA) and Inkscape (<https://inkscape.org>).

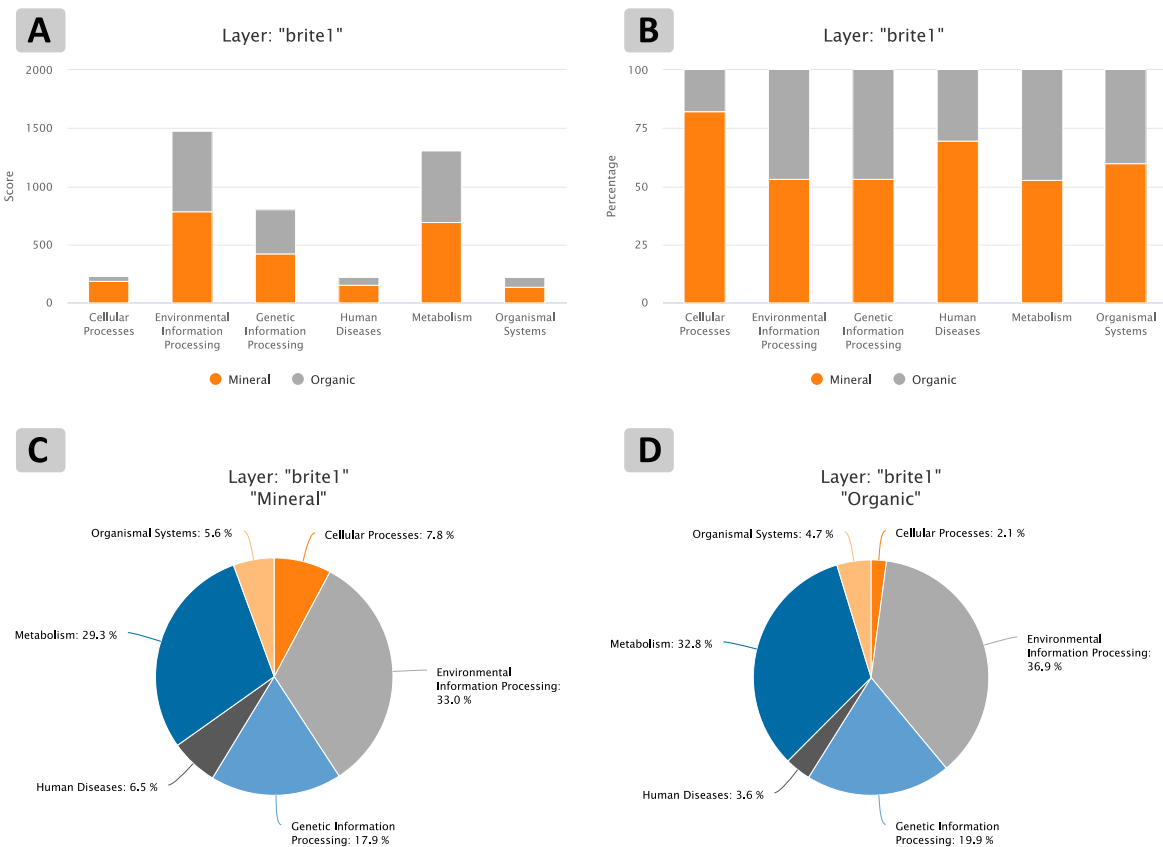

۷۳۰  
۷۳۱ Fig. 9. KEGG BRITE 1 analysis. Stacked barplots and pie charts of mineral and soil clusters  
۷۳۲ involved in KEGG BRITE 1. (A and B) Stacked barplots of mineral and organic data series before  
۷۳۳ and after the normalization step. (C and D) Pie charts of mineral and organic clusters
